## CORRESPONDENCE

## References

1. Montgomery CJ, McCormack JP, Reichert CC, Marsland CP: Plasma concentrations after high-dose ( $45 \text{ mg} \cdot \text{kg}^{-1}$ ) rectal acetaminophen in children. *Can J Anaesth* 1995; 42:982-6
2. Dange SV, Shah KU, Deshpande AS, Shrotri DS: Bioavailability of acetaminophen after rectal administration. *Indian Pediatr* 1987; 24:331-2
3. Birmingham PK, Tobin MJ, Henthorn TK, Fisher DM, Berkelhamer MC, Smith FA, Fanta KB, Coté CJ: Twenty-four-hour pharmacokinetics of rectal acetaminophen in children: An old drug with new recommendations. *ANESTHESIOLOGY* 1997; 87:244-52
4. Anderson BJ, Woolard GA, Holford NH: Pharmacokinetics of rectal paracetamol after major surgery in children. *Paediatr Anaesth* 1995; 5:237-42

(Accepted for publication December 17, 1997.)

Anesthesiology

1998; 88:1133

© 1998 American Society of Anesthesiologists, Inc.

Lippincott-Raven Publishers

## Endoscopic Saphenous Vein Harvesting and $\text{ETCO}_2$ in Cardiac Surgery Patients

*To the Editor:*—Harvest of the greater saphenous vein is a commonly performed procedure in patients undergoing coronary artery bypass grafting (CABG). Minimally invasive video-assisted removal of the saphenous vein in these patients is believed to be associated with decreased complications and greater patient satisfaction than with traditional harvesting techniques.<sup>1-3</sup>

A new endoscopic vein harvesting system (Guidant Corporation, Menlo Park, CA) uses carbon dioxide ( $\text{CO}_2$ ) to aid in the visualization and dissection of the saphenous vein along its linear course.  $\text{CO}_2$  is insufflated at 12-15 mmHg/min, and 10-20 l of  $\text{CO}_2$  may be insufflated during this 45- to 60-min procedure.

Increases in minute ventilation required to maintain preinsufflation arterial carbon dioxide tension ( $\text{PaCO}_2$ ) during laparoscopic cholecystectomy have been reported.<sup>4-6</sup> We have observed a 10-20% increase in the baseline end tidal carbon dioxide ( $\text{ETCO}_2$ ) levels, as measured by capnography, in patients undergoing endoscopic saphenous vein harvesting with  $\text{CO}_2$  insufflation. However, early in the learning curve, greater total amounts of  $\text{CO}_2$  are insufflated because of increased time needed to master the dissection process. Hence, we have observed even greater increases in  $\text{ETCO}_2$ .

At our institution, concomitant with saphenous vein dissection, the Internal Mammary Artery (IMA) is being exposed by the cardiac surgeon. We routinely decrease the patient's tidal volume (TV) during this time to assist the surgeon in his or her visualization of the IMA. Increases in the  $\text{ETCO}_2$  from this decrease in TV compounded by the increase in  $\text{ETCO}_2$  resulting from the endoscopic saphenous vein harvest may lead to notable changes in  $\text{ETCO}_2$  and alterations in hemodynamics. If video-assisted endoscopic saphenous vein harvest becomes routine in CABG surgery, precautionary measures (such as increases in respiratory rate) should be anticipated.

**James M. Gayes, M.D.**

Department of Anesthesiology  
Abbott Northwestern Hospital  
Chicago Avenue at 28th Street  
Minneapolis, Minnesota 55404

## References

1. Allen KB, Shaar CJ: Endoscopic saphenous vein harvesting. *Ann Thor Surg* 1997; 64(1):265-6
2. Cusimano RJ, Dale L, Butnay JW: Minimally invasive surgery for the removal of the greater saphenous vein. *Can J Surg* 1996; 39:386-8
3. Lumsden AB, Eaves FF 3rd, Offenloch JC, Jordan WD: Subcutaneous, video-assisted saphenous vein harvest: A report of the first 30 cases. *Cardiovasc Surg* 1996; 4(6):771-6
4. Baraka A, Jabbour S, Aouad M, Najjar F, Khoury G, Sibai A: Can pulse oximetry and end-tidal capnography reflect arterial oxygenation and carbon dioxide elimination during laparoscopic cholecystectomy? *Surg Laparosc Endosc* 1994; 4(5):353-6
5. Baraka A, Jabbour S, Aouad M, Najjar F, Khoury G, Sibai A: End-tidal carbon dioxide tension during laparoscopic cholecystectomy. Correlation with baseline value prior to  $\text{CO}_2$  insufflation. *Anaesthesia* 1994; 49(4):304-6
6. Wahba RW, Mamazza J: Ventilatory requirements during laparoscopic cholecystectomy. *Can J Anaesth* 1993; 40(3):206-10

(Accepted for publication December 1, 1997.)
